# Supplementary material for: Sex differences in the progression of glucose metabolism dysfunction in Alzheimer’s disease
Source: PubMed Central journal article supplement (PMC10238450; doi:10.1038/s12276-023-00993-3), 2023-05-01
Supplement: 12276_2023_993_MOESM1_ESM.pdf [file 12276_2023_993_MOESM1_ESM.pdf]

**Supplemental materials**

**TITLE: Sex differences in the progression of glucose metabolism dysfunction in Alzheimer's disease**

Park *et al.*

**\*Corresponding authors:**

1) Inhee Mook-Jung, Ph.D.

Department of Biochemistry & Biomedical Sciences, SNU Dementia Research Center  
Seoul National University College of Medicine  
103 Daehak-ro, Jongno-gu, Seoul 03080, Republic of Korea  
Tel: +82-2-740-8245; Fax: +82-2-3672-7352; Email: inhee@snu.ac.kr

2) Sun-Ho Han, Ph.D.

Department of Biochemistry & Biomedical Sciences, Neuroscience Research Institute  
Seoul National University College of Medicine  
103 Daehak-ro, Jongno-gu, Seoul 03080, Republic of Korea  
Tel: +82-2-3668-7640; Fax: +82-2-3672-7352; Email: sunho@snu.ac.kr

## Supplementary Tables

**Supplementary Table 1. Neurodegeneration markers and plasma beta-amyloid 42/40 ratio**

| MRI                | Gender | <u>Plasma beta-amyloid 42/40 ratio</u>                        |                                                                                       |                                                      |
|--------------------|--------|---------------------------------------------------------------|---------------------------------------------------------------------------------------|------------------------------------------------------|
|                    |        | Neurodegeneration (baseline) vs beta-amyloid 42/40 (baseline) | Neurodegeneration (2 <sup>nd</sup> year) vs beta-amyloid 42/40 (2 <sup>nd</sup> year) | Δ Neurodegeneration vs beta-amyloid 42/40 (baseline) |
| Hippocampal volume | Male   | p = 0.9827<br>r = -0.0028                                     | p = 0.8296<br>r = -0.0270                                                             | p = 0.5298<br>r = -0.0820                            |
|                    | Female | p = 0.7970<br>r = 0.0265                                      | p = 0.4530<br>r = 0.0737                                                              | p = 0.9291<br>r = -0.0092                            |
| Cortical thickness | Male   | p = 0.4100<br>r = 0.1065                                      | p = 0.1885<br>r = 0.1639                                                              | p = 0.3681<br>r = 0.1163                             |
|                    | Female | <b><i>#p = 0.0604</i></b><br><b><i>r = 0.1866</i></b>         | p = 0.7686<br>r = 0.0289                                                              | p = 0.4188<br>r = -0.0809                            |

- The statistical p-values were obtained by partial correlation analysis (covariates: age, PiB-PET SUVR values; #p < 0.1, \*p < 0.05, and \*\*p < 0.01). Statistically significant p-values were shown in bold & italic.
- Abbreviations: MRI, magnetic resonance imaging; delta (Δ), difference between the second and first measurement values

**Supplementary Table 2. Different correlation patterns of brain metabolism with other representative plasma AD biomarkers between males and females**

| Brain ROIs              | Gender | Plasma beta-amyloid 1-42                       |                                                                        |                                                       | Plasma beta-amyloid 1-40                               |                                                                        |                                               | Plasma tau                              |                                                                 |                                                         |
|-------------------------|--------|------------------------------------------------|------------------------------------------------------------------------|-------------------------------------------------------|--------------------------------------------------------|------------------------------------------------------------------------|-----------------------------------------------|-----------------------------------------|-----------------------------------------------------------------|---------------------------------------------------------|
|                         |        | FDG (baseline) vs beta-amyloid 1-42 (baseline) | FDG (2 <sup>nd</sup> year) vs beta-amyloid 1-42 (2 <sup>nd</sup> year) | Δ FDG (delta) vs beta-amyloid 1-42 (baseline)         | FDG (baseline) vs beta-amyloid 1-40 (baseline)         | FDG (2 <sup>nd</sup> year) vs beta-amyloid 1-40 (2 <sup>nd</sup> year) | Δ FDG (delta) vs beta-amyloid 1-40 (baseline) | FDG (baseline) vs Plasma tau (baseline) | FDG (2 <sup>nd</sup> year) vs Plasma tau (2 <sup>nd</sup> year) | Δ FDG (delta) vs Plasma tau (baseline)                  |
| 4 ROIs                  | Male   | p = 0.7177<br>r = -0.0461                      | p = 0.1557<br>r = 0.1754                                               | p = 0.7863<br>r = -0.0346                             | p = 0.5954<br>r = 0.0671                               | p = 0.8899<br>r = 0.0172                                               | p = 0.9443<br>r = -0.0089                     | p = 0.4977<br>r = -0.0843               | p = 0.6697<br>r = -0.0530                                       | <b><i>*p = 0.0311</i></b><br><b><i>r = -0.2636</i></b>  |
|                         | Female | p = 0.5920<br>r = -0.0522                      | p = 0.3002<br>r = 0.1016                                               | <b><i>*p = 0.0393</i></b><br><b><i>r = 0.1986</i></b> | <b><i>#p = 0.0808</i></b><br><b><i>r = -0.1688</i></b> | p = 0.5998<br>r = -0.0515                                              | p = 0.7317<br>r = 0.0337                      | p = 0.5901<br>r = -0.0522               | p = 0.2181<br>r = -0.1189                                       | p = 0.8731<br>r = 0.0155                                |
| Hippocampus             | Male   | p = 0.5654<br>r = 0.0738                       | p = 0.9032<br>r = 0.0152                                               | p = 0.3267<br>r = -0.1256                             | p = 0.5274<br>r = 0.0805                               | p = 0.9170<br>r = -0.0130                                              | p = 0.5872<br>r = -0.0692                     | p = 0.6064<br>r = -0.0646               | p = 0.1676<br>r = -0.1706                                       | <b><i>*p = 0.0728</i></b><br><b><i>r = -0.2223</i></b>  |
|                         | Female | p = 0.5777<br>r = -0.0542                      | p = 0.4924<br>r = 0.0674                                               | p = 0.3267<br>r = -0.1256                             | <b><i>*p = 0.0441</i></b><br><b><i>r = -0.1941</i></b> | p = 0.8302<br>r = -0.0211                                              | p = 0.3075<br>r = -0.0991                     | p = 0.3393<br>r = 0.0924                | p = 0.7400<br>r = -0.0321                                       | p = 0.7747<br>r = -0.0277                               |
| Para-Hippocampal gyrus  | Male   | p = 0.5775<br>r = 0.0710                       | p = 0.7080<br>r = -0.0466                                              | p = 0.5819<br>r = -0.0701                             | p = 0.7423<br>r = 0.0416                               | p = 0.9011<br>r = 0.0155                                               | p = 0.9351<br>r = -0.0103                     | p = 0.5165<br>r = -0.0807               | p = 0.3185<br>r = -0.1237                                       | p = 0.1537<br>r = -0.1762                               |
|                         | Female | p = 0.9448<br>r = 0.0067                       | p = 0.4526<br>r = 0.0737                                               | p = 0.1190<br>r = 0.1509                              | <b><i>*p = 0.0138</i></b><br><b><i>r = -0.2364</i></b> | p = 0.9344<br>r = 0.0081                                               | p = 0.1691<br>r = -0.1333                     | p = 0.4249<br>r = 0.0772                | p = 0.7856<br>r = -0.0264                                       | p = 0.6115<br>r = 0.0492                                |
| Medial frontal cortex   | Male   | p = 0.5638<br>r = 0.0735                       | p = 0.1781<br>r = -0.1665                                              | p = 0.6720<br>r = -0.0540                             | p = 0.1597<br>r = 0.1765                               | p = 0.6723<br>r = -0.0526                                              | p = 0.8430<br>r = -0.0250                     | p = 0.5314<br>r = -0.0778               | p = 0.6468<br>r = 0.0570                                        | p = 0.6712<br>r = 0.0528                                |
|                         | Female | p = 0.2676<br>r = -0.1076                      | p = 0.7465<br>r = 0.0318                                               | p = 0.1001<br>r = 0.1591                              | p = 0.1104<br>r = -0.545                               | p = 0.5011<br>r = -0.0661                                              | p = 0.8089<br>r = -0.0235                     | p = 0.2785<br>r = -0.1047               | p = 0.7138<br>r = -0.0355                                       | <b><i>*p = 0.0879</i></b><br><b><i>r = 0.1643</i></b>   |
| Inferior temporal gyrus | Male   | p = 0.9524<br>r = 0.0076                       | p = 0.1632<br>r = 0.1723                                               | p = 0.7253<br>r = -0.0448                             | p = 0.9357<br>r = -0.0102                              | p = 0.6978<br>r = 0.0483                                               | p = 0.7339<br>r = 0.0430                      | p = 0.5642<br>r = -0.0717               | p = 0.3317<br>r = -0.1204                                       | <b><i>**p = 0.0048</i></b><br><b><i>r = -0.3404</i></b> |
|                         | Female | p = 0.8705<br>r = -0.0159                      | p = 0.1325<br>r = 0.1470                                               | <b><i>*p = 0.0663</i></b><br><b><i>r = 0.1774</i></b> | p = 0.1362<br>r = -0.1443                              | p = 0.8523<br>r = -0.0183                                              | p = 0.8421<br>r = 0.0194                      | p = 0.5552<br>r = -0.0571               | p = 0.3411<br>r = -0.0921                                       | p = 0.9426<br>r = -0.0070                               |

- The statistical p-values were obtained by partial correlation analysis (covariates: age, PiB-PET SUVR values; #p < 0.1, \*p < 0.05, and \*\*p < 0.01). Statistically significant p-values were shown in bold & italic.
- Abbreviations: ROI, region of interest; FDG, fluorodeoxyglucose; delta (Δ), difference between the second and first measurement values

**Supplementary Table 3. Neurodegeneration markers and plasma beta-amyloid 42, 40, and tau**

| Brain ROIs                | Gender        | <u>Plasma beta-amyloid 1-42</u>                              |                                                                                      |                                                     | <u>Plasma beta-amyloid 1-40</u>                              |                                                                                      |                                                     | <u>Plasma tau</u>                              |                                                                        |                                       |
|---------------------------|---------------|--------------------------------------------------------------|--------------------------------------------------------------------------------------|-----------------------------------------------------|--------------------------------------------------------------|--------------------------------------------------------------------------------------|-----------------------------------------------------|------------------------------------------------|------------------------------------------------------------------------|---------------------------------------|
|                           |               | Neurodegeneration (baseline) vs beta-amyloid 1-42 (baseline) | Neurodegeneration (2 <sup>nd</sup> year) vs beta-amyloid 1-42 (2 <sup>nd</sup> year) | Δ Neurodegeneration vs beta-amyloid 1-42 (baseline) | Neurodegeneration (baseline) vs beta-amyloid 1-40 (baseline) | Neurodegeneration (2 <sup>nd</sup> year) vs beta-amyloid 1-40 (2 <sup>nd</sup> year) | Δ Neurodegeneration vs beta-amyloid 1-40 (baseline) | Neurodegeneration (baseline) vs tau (baseline) | Neurodegeneration (2 <sup>nd</sup> year) vs tau (2 <sup>nd</sup> year) | Δ Neurodegeneration vs tau (baseline) |
| <b>Hippocampal volume</b> | <b>Male</b>   | p = 0.8626<br>r = 0.0226                                     | p = 0.3469<br>r = -0.1167                                                            | p = 0.2300<br>r = -0.1560                           | p = 0.9398<br>r = 0.0098                                     | p = 0.9278<br>r = -0.0113                                                            | p = 0.4950<br>r = -0.0882                           | p = 0.8928<br>r = 0.0172                       | p = 0.4746<br>r = -0.0888                                              | p = 0.9061<br>r = -0.0150             |
|                           | <b>Female</b> | p = 0.1728<br>r = -0.1396                                    | p = 0.4394<br>r = -0.0763                                                            | p = 0.9426<br>r = 0.0074                            | <i><b>p = 0.0917</b></i><br><i><b>r = -0.1722</b></i>        | p = 0.7392<br>r = -0.0329                                                            | p = 0.6726<br>r = -0.0434                           | p = 0.4984<br>r = 0.0691                       | p = 0.1471<br>r = -0.1404                                              | p = 0.3978<br>r = -0.0864             |
| <b>Cortical thickness</b> | <b>Male</b>   | p = 0.8658<br>r = 0.0219                                     | p = 0.5546<br>r = 0.0735                                                             | p = 0.5984<br>r = 0.0682                            | p = 0.3337<br>r = -0.1238                                    | p = 0.6049<br>r = -0.0488                                                            | p = 0.9130<br>r = -0.0141                           | p = 0.1654<br>r = -0.1741                      | p = 0.5187<br>r = -0.0802                                              | p = 0.9464<br>r = -0.0085             |
|                           | <b>Female</b> | p = 0.8479<br>r = 0.0192                                     | p = 0.1519<br>r = -0.1408                                                            | p = 0.2440<br>r = -0.1164                           | <i><b>p = 0.0141</b></i><br><i><b>r = -0.2425</b></i>        | p = 0.4953<br>r = -0.0673                                                            | p = 0.3701<br>r = -0.0897                           | p = 0.5611<br>r = -0.0579                      | <i><b>p = 0.0229</b></i><br><i><b>r = -0.2189</b></i>                  | p = 0.6282<br>r = 0.0483              |

- The statistical p-values were obtained by partial correlation analysis (covariates: age, PiB-PET SUVR values; #p < 0.1, \*p < 0.05, and \*\*p < 0.01). Statistically significant p-values were shown in bold & italic.
- Abbreviations: MRI, magnetic resonance imaging; delta (Δ), difference between the second and first measurement values

**Supplementary Table 4. Details of ROC curve analyses**

| Characteristics (n)               | Diagnostic model         |                                   |                          |                                   | Predictive model         |                                   |                          |                                   |
|-----------------------------------|--------------------------|-----------------------------------|--------------------------|-----------------------------------|--------------------------|-----------------------------------|--------------------------|-----------------------------------|
|                                   | Male                     |                                   | Female                   |                                   | Male                     |                                   | Female                   |                                   |
|                                   | CV                       | CV +<br>beta-<br>amyloid<br>42/40 | CV                       | CV +<br>beta-<br>amyloid<br>42/40 | CV                       | CV +<br>beta-<br>amyloid<br>42/40 | CV                       | CV +<br>beta-<br>amyloid<br>42/40 |
| <b>AUC (95% CI)</b>               | 0.607<br>(0.48,<br>0.72) | 0.610<br>(0.48,<br>0.73)          | 0.665<br>(0.57,<br>0.75) | 0.712<br>(0.62,<br>0.80)          | 0.697<br>(0.57,<br>0.80) | 0.709<br>(0.58,<br>0.81)          | 0.671<br>(0.58,<br>0.76) | 0.719<br>(0.63,<br>0.80)          |
| <b>Significance (P)</b>           | <b>0.1325</b>            | <b>0.1273</b>                     | <b>0.0017</b><br>(**)    | <b>&lt; 0.0001</b><br>(****)      | <b>0.0094</b><br>(**)    | <b>0.0051</b><br>(**)             | <b>0.0102</b><br>(*)     | <b>0.0004</b><br>(***)            |
| <b>Sensitivity (%)</b>            | 94.7                     | 81.6                              | 60.7                     | 75.0                              | 78.6                     | 85.7                              | 75.0                     | 85.0                              |
| <b>Specificity (%)</b>            | 30.0                     | 46.7                              | 66.0                     | 62.3                              | 65.4                     | 65.4                              | 58.9                     | 58.9                              |
| <b>+PV / -PV (%)</b>              | 63.2 /<br>81.8           | 66.0 /<br>66.7                    | 65.4 /<br>61.4           | 67.7 /<br>70.2                    | 37.9 /<br>91.9           | 40.0 /<br>94.4                    | 28.8 /<br>91.4           | 31.5 /<br>94.6                    |
| <b>Cut-off<br/>(Youden index)</b> | > 0.553                  | > 0.592                           | > 0.642                  | > 0.630                           | > 0.225                  | > 0.230                           | > 0.167                  | > 0.151                           |

- AUC, area under the curve; 95% CI, 95% confidence interval; cut-off criterion was determined by Youden index

- The cut-off values were logit values derived from logistic regression models with the controlling for ApoE, age, education, and cerebral amyloid deposition (PiB-PET SUVR values)

## Supplementary Figures

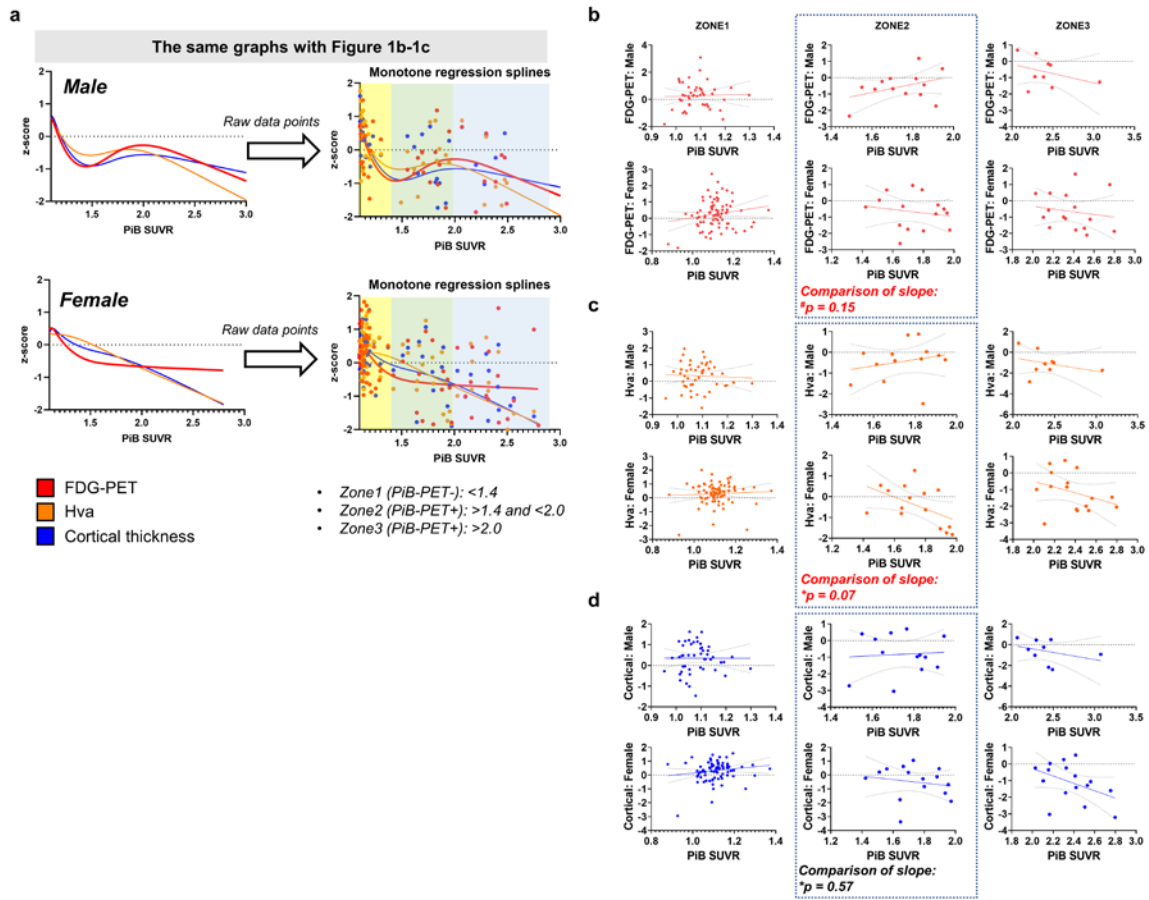

**Supplementary Fig. 1. Comparison of zones on the spline curves between males and females (a)** The same graph with Figure 1b-1c, but graphs are divided into three zones according to the degree of cerebral amyloid deposition (zone 1, PiB-PET SUVR < 1.4; zone 2,  $1.4 \leq$  PiB-PET SUVR < 2.0; zone 3, PiB-PET SUVR  $\geq$  2.0). **(b-d)** Correlation of FDG-PET, hippocampal volume, and cortical thickness with cerebral amyloid deposition depending on each zone. Comparison of slope analysis was performed for zone 2 using Two slopes calculator software (<https://www.danielsoper.com/statcalc>;  $*P < 0.1$ ,  $^{\#}P < 0.2$ ). **Abbreviations:** PiB-PET, Pittsburgh compound B-positron emission tomography; SUVR, standardized uptake value ratio; Hva, hippocampal volumes; FDG-PET, fluorodeoxyglucose-PET.

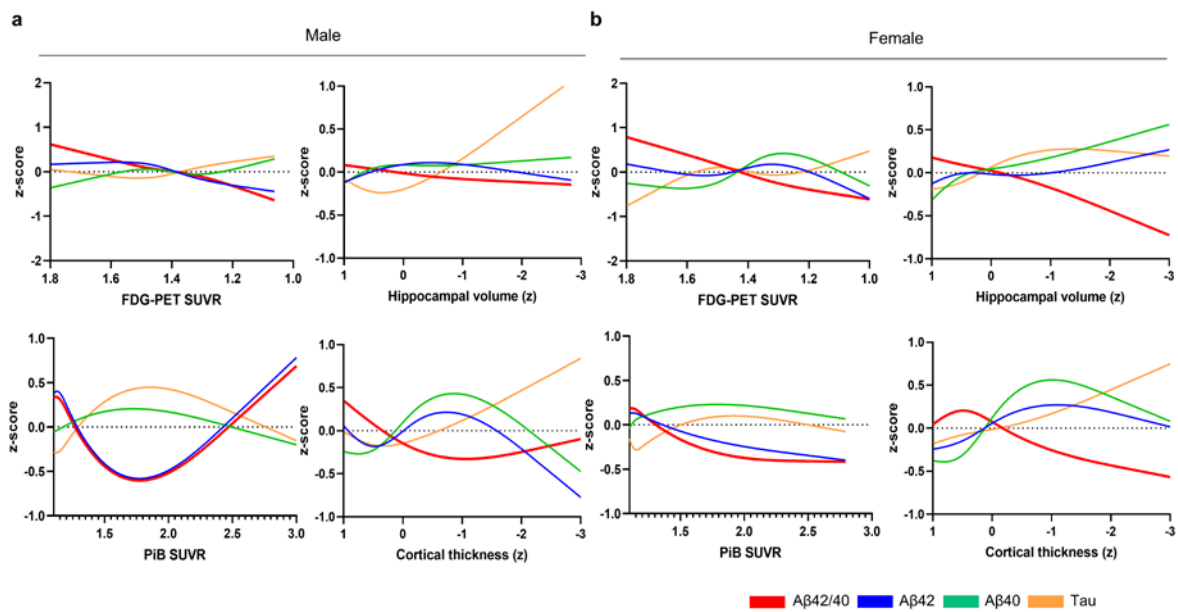

**Supplementary Fig. 2. Monotone spline models for plasma biomarkers and brain images (a-b)**

Monotone spline models for plasma biomarkers in both males and females. To effectively show comparisons between different plasma biomarkers, their levels have been transferred to z-scores. FDG-PET SUVR acted as a proxy for the progression time of brain hypometabolism. PiB-PET SUVR acted as a proxy for the progression time of AD. Hippocampal volume or cortical thickness acted as a proxy for the progression time of neurodegeneration. Smoothing splines with four knots were created. **Abbreviations:** PET, Pittsburgh compound B-positron emission tomography; SUVR, standardized uptake value ratio; Hva, hippocampal volumes; FDG-PET, fluorodeoxyglucose-positron emission tomography.

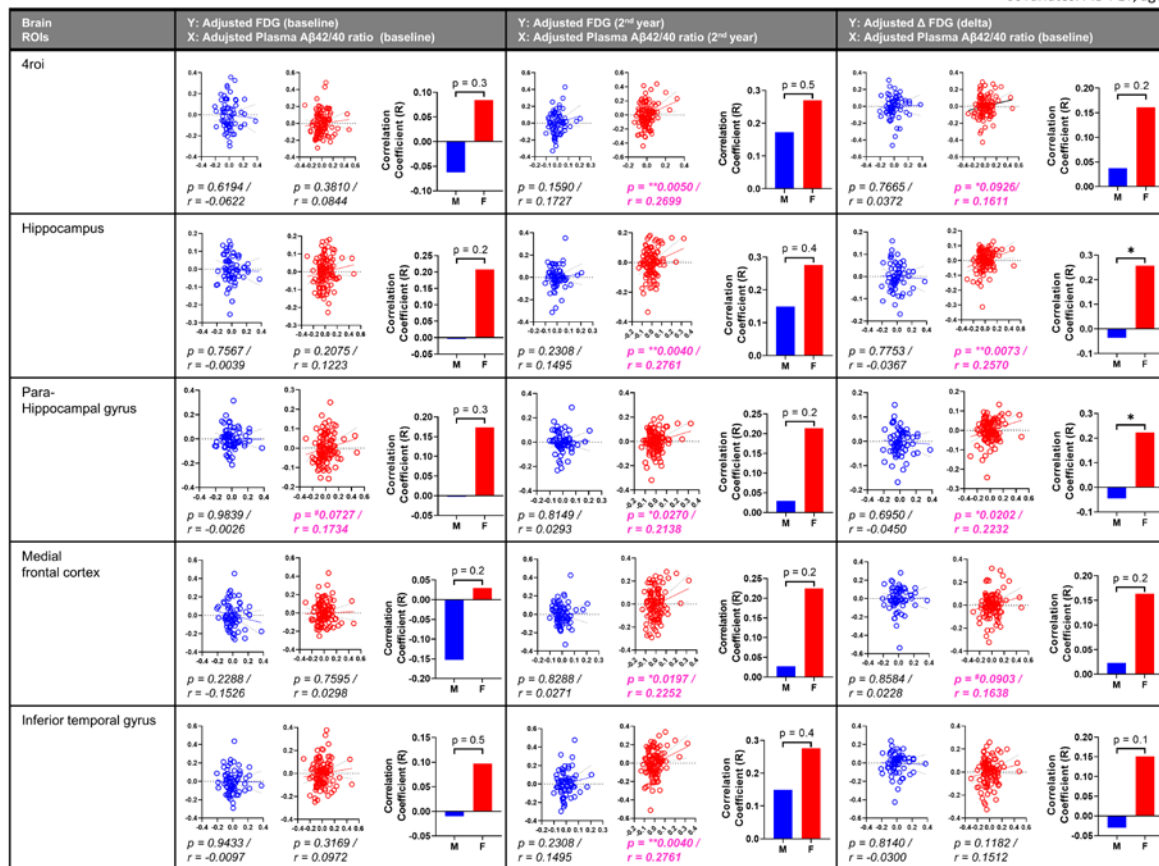

**Supplementary Fig. 3. Partial correlation analysis for FDG-PET and plasma beta-amyloid 42/40 ratio and comparison of correlation coefficient (R) between males and females** Differences in correlation patterns between sexes. Partial correlation analyses between the plasma beta-amyloid 42/40 ratio and the FDG-PET SUVR values of each region (4rois, composite of angular gyrus, posterior cingulate cortex, precuneus, and inferior temporal gyrus). PiB-PET SUVR values and age were used as covariates. Delta indicates the difference between the first and second measurement values. Comparison of correlation coefficients analyses with the correction of the number of patients between males and females were also performed (\* $P < 0.1$ ). **Abbreviations:** roi, region of interest; FDG-PET, fluorodeoxyglucose-positron emission tomography; M, males; F, females.



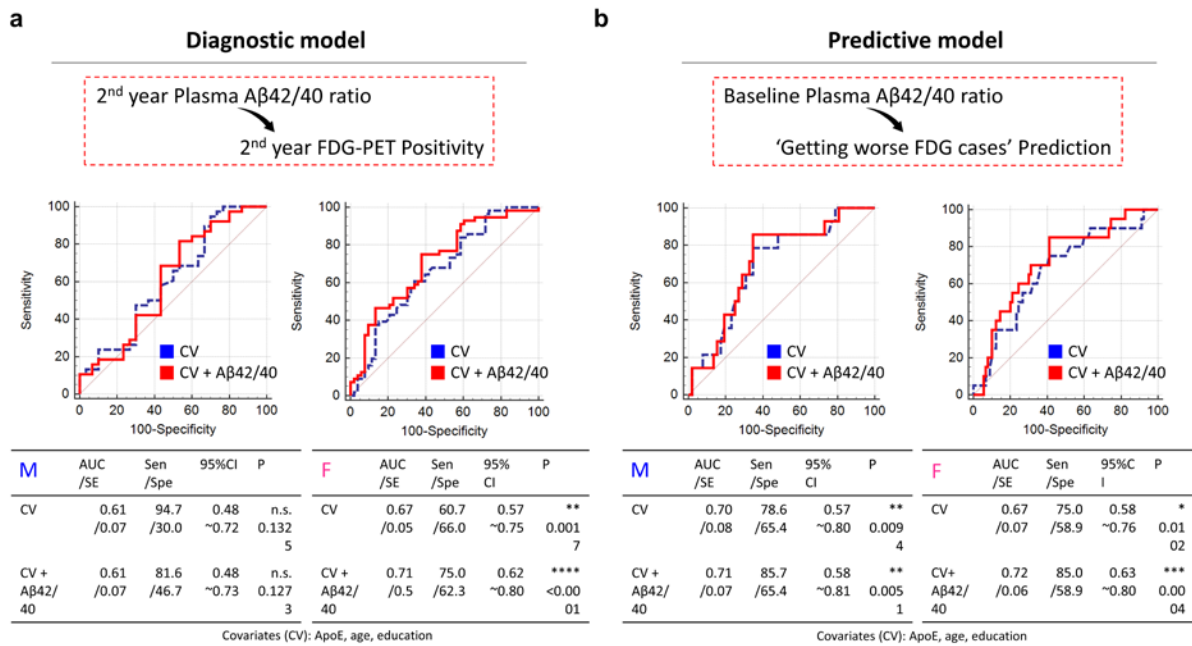

**Supplementary Fig. 4. Plasma beta-amyloid 42/40 ratio and its application in brain metabolic dysfunction biomarker analysis in females** (a) Diagnostic ROC curve model for brain metabolic dysfunction. FDG-PET positivity was used as an independent variable based on previous research. The 2<sup>nd</sup> year plasma beta-amyloid 42/40 ratio values were used as a dependent variable. (b) Predictive ROC curve model for brain metabolic dysfunction. The 'getting worse' group, which is the same in Figure 1, was used as an independent variable. Baseline plasma beta-amyloid 42/40 ratio values were used as a dependent variable. ApoE, age, and education levels were used as covariates (CV). \*P<0.05, \*\*P<0.01, \*\*\*P<0.001, and \*\*\*\*P<0.0001 for the AUC of ROC curves. **Abbreviations:** PiB-PET, Pittsburgh compound B-positron emission tomography; SUVR, standardized uptake value ratio; adj, adjusted; AUC, area under the curve; Sen, sensitivity; Spe, specificity; CI, confidence interval; P, P-values.

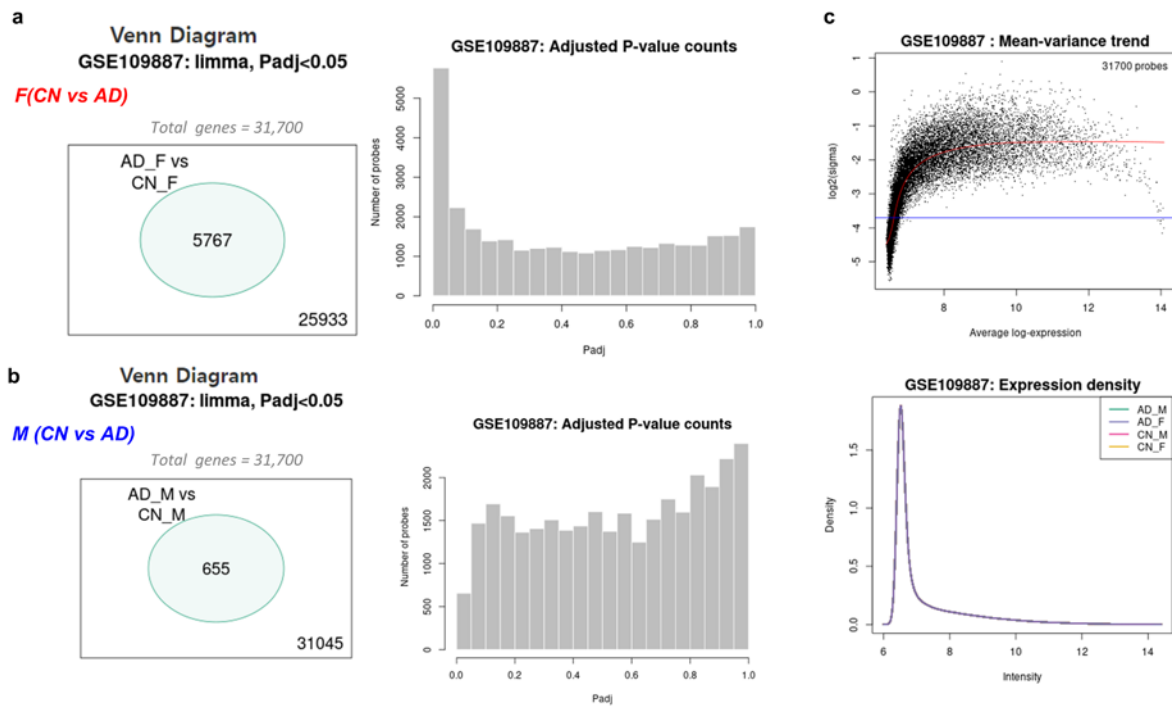

## GSE109887

**Supplementary Fig. 5. Analysis information for GSE109887 (cohort 2)** (a-b) Venn diagram shows that total gene numbers used for RNA sequencing analysis were exactly equal (31,700) for both males and females. Adjusted P-value histograms are also shown for both males and females. (c) For RNA sequencing analysis, 31,700 genes were successfully loaded. The expression densities were well distributed for all four groups (no differences between the groups). **Abbreviations:** Padj, adjusted p-value; AD, Alzheimer's disease; CN, cognitively normal; M, males; F, females.

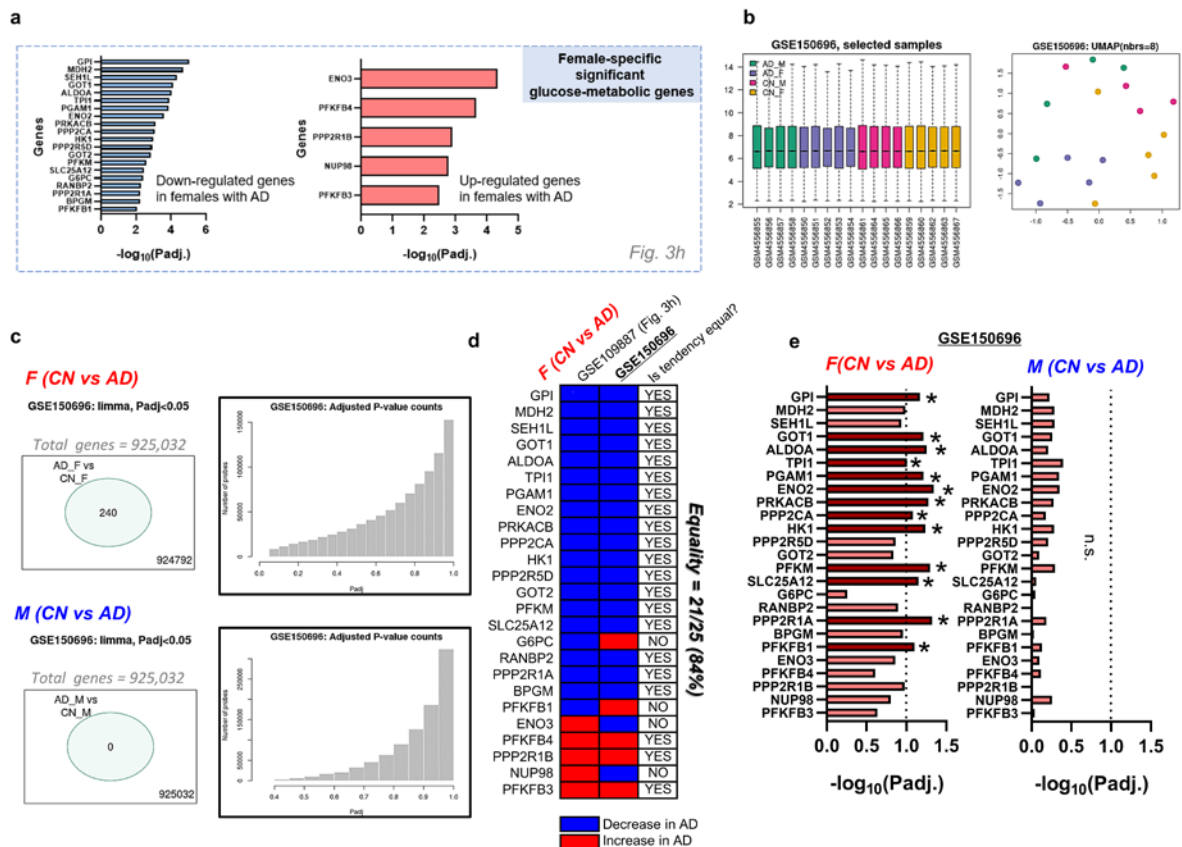

**Supplementary Fig. 6. Validation of GSE109887 (cohort 2) using another publicly available cohort (GSE150696; cohort 3)** (a) Female-specific glucose metabolic gene list from the result of Fig. 3h. (b) Box-plot result shows that the samples were well-normalized and ready for differential expression analysis. Uniform Manifold Approximation and Projection (UMAP) shows how samples are related to each other. (c) Venn diagram shows that total gene numbers used for RNA sequencing analysis were exactly equal (925,032) for both males and females. Adjusted P-value histograms are also shown for both males and females. (d) Comparison of female-specific glucose metabolic genes between cohort 2 and cohort 3. The up/down tendency for genes from cohort 3 were highly similar to the results from cohort 2 (equality, 84%). (e) The female-specific glucose metabolic genes (from cohort 2) also showed statistical significance in females of cohort 3, but not in males. **Abbreviations:** Padj, adjusted p-value; AD, Alzheimer's disease; CN, cognitively normal; M, males; F, females.
